# Supplementary material for: A facile way of fabricating a flexible and conductive cotton fabric
Source: Royal Society of Chemistry journal article supplement (doi:10.1039/c5tc03679h), 2016-01-01
Supplement: c5tc03679h1.pdf [file c5tc03679h1.pdf]

## Supporting Information

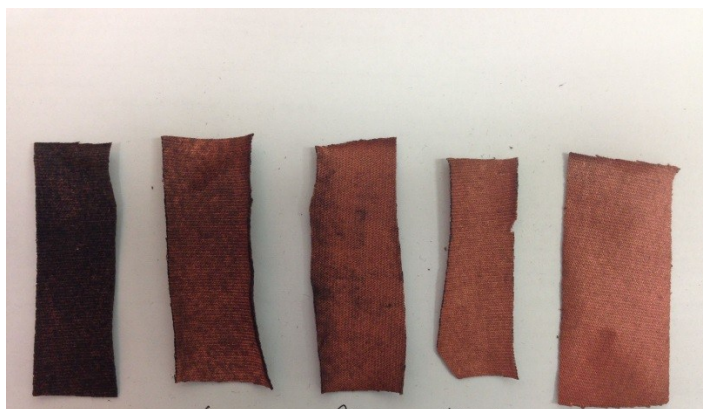

Fig. S1 From left to right, color of each cotton fabric sample at different ELD plating time 30 , 60, 90, 120 and 150 min

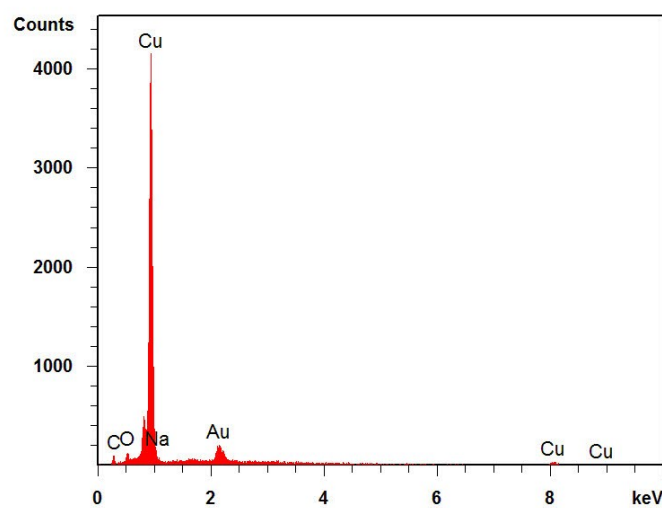

Fig. S2 Energy Dispersive X-Ray Spectroscopy(EDS) analysis of the as-made copper cotton.

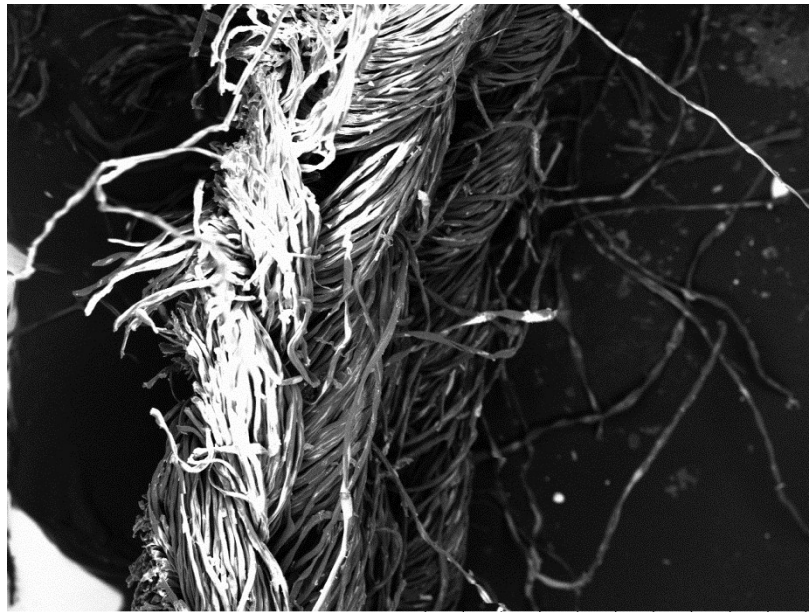

TM3030Plus0102 N D7.6 x80 1 mm

Fig. S3 Examination of single yarn pulled from copper-coated fabric sample

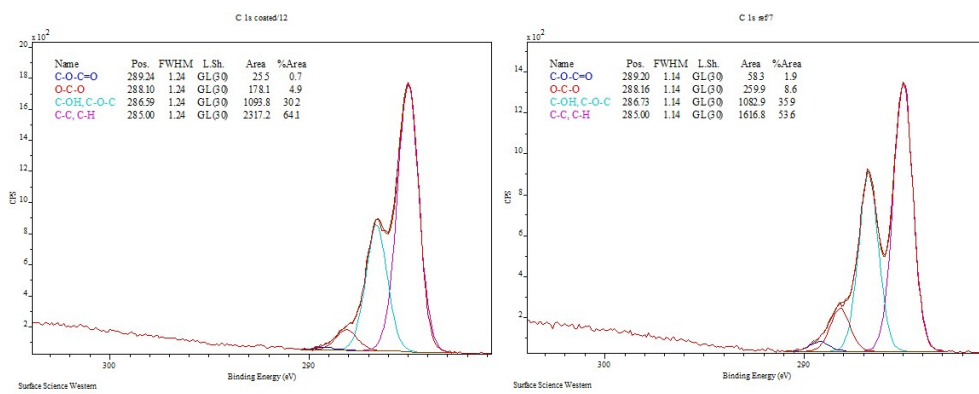

Fig. S4 C1s XPS spectra of(left) coated cotton fabric,(right) pristine cotton fabric

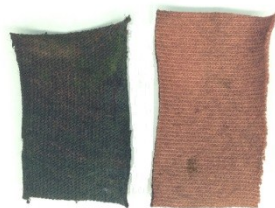

Fig. S5 Two cotton fabric samples after ELD process; Left: without surface treatment; Right: with surface treatment

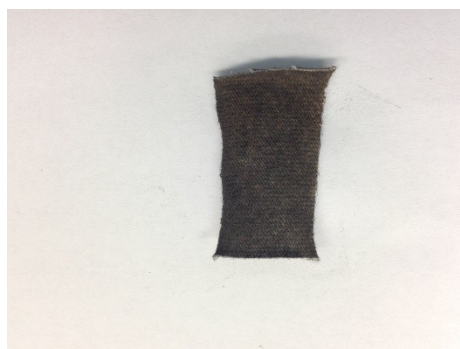

Fig. S6

Sn-Cu cotton fabric sample

Table S1 The major elemental analysis of pristine cotton fabric, coated cotton fabric by XPS

|               | C(wt.%) | O(wt%) | N(wt%) |
|---------------|---------|--------|--------|
| Cotton fabric | 65.6%   | 28.9%  | 0%     |
| Coated cotton | 69.2%   | 23.7%  | 1.9%   |

Table S2 The major element analysis at the intersection of cotton fabric sample after absorbing silver ions

|                          | C(wt.%) | O(wt.%) | Ag(wt.%) |
|--------------------------|---------|---------|----------|
| Cotton fabric before ELD | 3.74%   | 43.73%  | 52.53%   |
